# Supplementary material
Source: Springer Nature journal article supplement (https://www.springermedizin.de/resource/supplementary/12992_2010_117_MOESM1_ESM.pdf/9616492)
Supplement: MOESM1 [file 9616492]

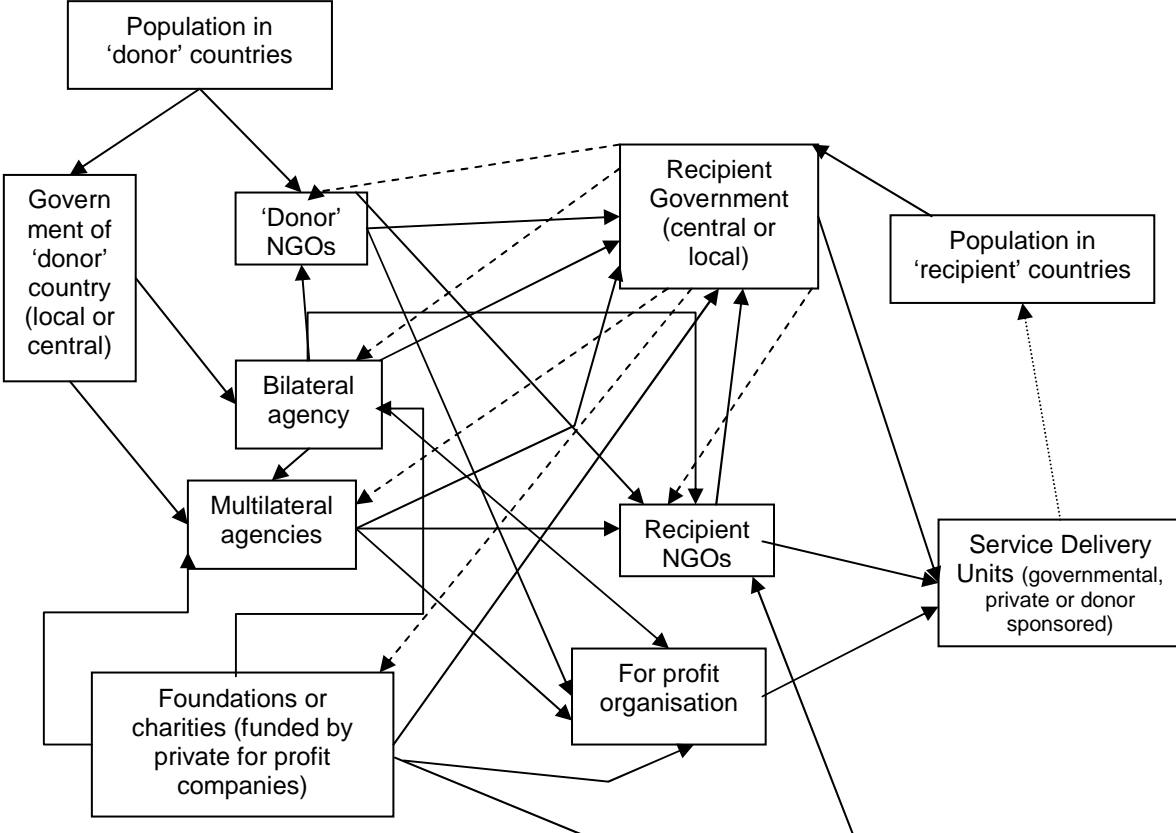

This entire figure reflect the sets of relationships in the area of international development assistance at the **macro level**; at the **meso level** are the relationships between organisations; the relationships within organisations are those at the **micro level**.

- Principal-Agent (financial) relationship —————>
- Principal-Agent (regulatory) relationship - - - - ->
- No Principal-Agent relationship .....>
